# Supplementary material
Source: publisher site journal article supplement (https://www.dovepress.com/article/431206)
Supplement: Supplementary file 1 [file get_supplementary_file.php]

## Supplementary Materials to:

# *RAD51AP1* as an immune-related prognostic biomarker and therapeutic response predictor in hepatocellular carcinoma

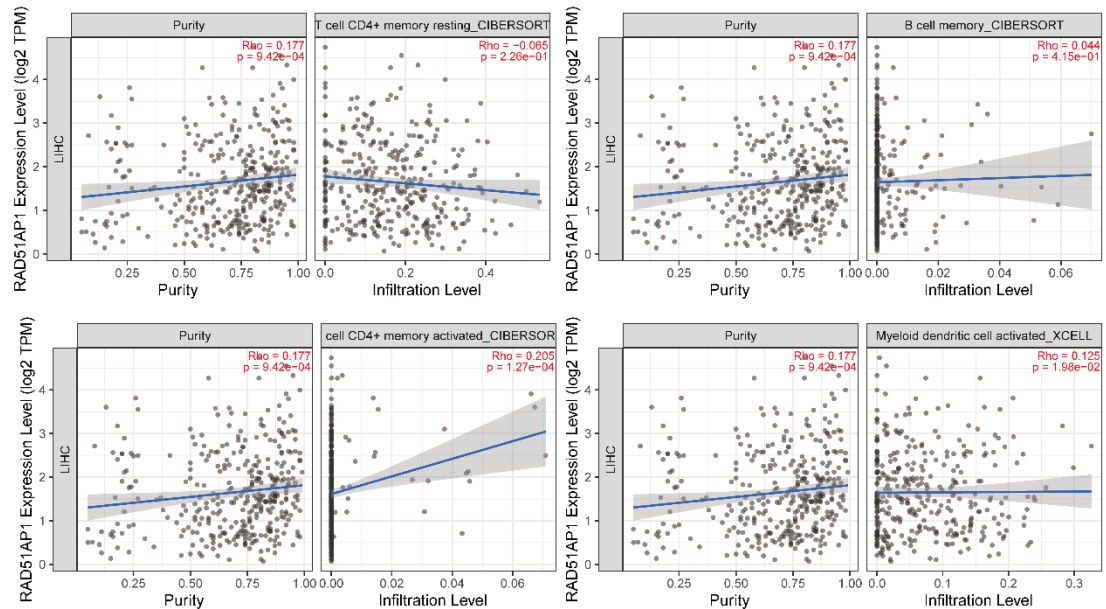

Supplementary Figure 1. In TIMER2, spearman correlation analyses revealed that *RAD51AP1* expression negatively correlated to the infiltration levels of T cells CD4<sup>+</sup> memory resting, but positively correlated to B cell memory, cell CD4<sup>+</sup> T memory activated and Myeloid dendritic cell activated in liver hepatocellular carcinoma (LIHC). TIMER2, Tumor Immune Estimation Resource 2; *RAD51AP1*, *RAD51* associated protein 1.

Supplementary Table 1. The clinicopathologic data of HCC patients in Guangxi cohort from the First Affiliated Hospital of Guangxi Medical University. HCC, Hepatocellular carcinoma.

| No. | Gender | Age (year) | serum AFP level | Tumor Size (cm) | BCLC stage | CNLC stage | Histologic Grade | PVTT |
|-----|--------|------------|-----------------|-----------------|------------|------------|------------------|------|
| 1   | male   | ≥60        | <400            | <5              | B          | IIa        | -                | No   |
| 2   | female | <60        | <400            | ≥5              | C          | IIIa       | I-II             | Yes  |
| 3   | male   | <60        | <400            | <5              | A          | Ia         | I-II             | No   |
| 4   | male   | ≥60        | ≥400            | <5              | A          | Ia         | III-IV           | No   |
| 5   | male   | ≥60        | <400            | <5              | B          | IIa        | I-II             | No   |
| 6   | male   | <60        | <400            | <5              | A          | Ia         | I-II             | No   |
| 7   | female | ≥60        | <400            | <5              | A          | Ia         | I-II             | No   |
| 8   | male   | <60        | <400            | ≥5              | B          | Ib         | I-II             | No   |
| 9   | male   | <60        | <400            | <5              | A          | Ia         | I-II             | No   |
| 10  | male   | <60        | ≥400            | <5              | A          | Ib         | I-II             | No   |
| 11  | male   | ≥60        | <400            | <5              | A          | Ia         | -                | No   |
| 12  | male   | <60        | <400            | <5              | A          | Ia         | I-II             | No   |
| 13  | male   | <60        | <400            | ≥5              | B          | Ib         | I-II             | No   |
| 14  | male   | ≥60        | <400            | <5              | A          | Ia         | I-II             | No   |
| 15  | male   | ≥60        | <400            | <5              | A          | Ia         | III-IV           | No   |
| 16  | male   | <60        | ≥400            | <5              | A          | Ia         | III-IV           | No   |
| 17  | male   | ≥60        | ≥400            | <5              | A          | Ia         | I-II             | No   |
| 18  | male   | ≥60        | <400            | <5              | A          | Ia         | I-II             | No   |
| 19  | male   | <60        | <400            | ≥5              | B          | Ib         | I-II             | No   |
| 20  | male   | <60        | <400            | <5              | C          | IIIa       | -                | Yes  |
| 21  | male   | <60        | <400            | <5              | A          | Ia         | I-II             | No   |
| 22  | male   | ≥60        | <400            | <5              | A          | Ia         | I-II             | No   |
| 23  | male   | <60        | ≥400            | <5              | A          | Ia         | III-IV           | No   |
| 24  | male   | <60        | <400            | ≥5              | B          | Ib         | III-IV           | No   |
| 25  | male   | <60        | ≥400            | <5              | A          | Ia         | I-II             | No   |
| 26  | female | <60        | ≥400            | ≥5              | B          | Ib         | III-IV           | No   |
| 27  | male   | ≥60        | ≥400            | ≥5              | B          | Ib         | III-IV           | No   |
| 28  | male   | <60        | ≥400            | ≥5              | B          | Ib         | III-IV           | No   |
| 29  | male   | ≥60        | <400            | ≥5              | A          | Ib         | I-II             | No   |
| 30  | male   | <60        | ≥400            | ≥5              | C          | IIIa       | I-II             | Yes  |
| 31  | male   | ≥60        | <400            | ≥5              | B          | Ib         | III-IV           | No   |
| 32  | male   | ≥60        | <400            | <5              | A          | Ia         | III-IV           | No   |
| 33  | male   | ≥60        | <400            | <5              | A          | IIa        | I-II             | No   |
| 34  | male   | <60        | <400            | <5              | A          | Ia         | I-II             | No   |
| 35  | male   | ≥60        | <400            | <5              | A          | Ia         | I-II             | No   |
| 36  | male   | ≥60        | <400            | ≥5              | C          | IIIa       | I-II             | Yes  |
| 37  | male   | ≥60        | ≥400            | ≥5              | B          | Ib         | III-IV           | No   |
| 38  | male   | <60        | ≥400            | ≥5              | B          | IIa        | III-IV           | No   |
| 39  | female | <60        | ≥400            | ≥5              | B          | Ib         | I-II             | No   |
| 40  | male   | <60        | ≥400            | ≥5              | B          | Ib         | I-II             | No   |
| 41  | male   | <60        | <400            | ≥5              | B          | Ib         | I-II             | No   |

| No. | Gender | Age (years) | serum AFP level | Tumor Size (cm) | BCLC stage | CNLC stage | Histologic Grade | PVTT |
|-----|--------|-------------|-----------------|-----------------|------------|------------|------------------|------|
| 42  | female | ≥60         | ≥400            | ≥5              | B          | Ib         | I-II             | No   |
| 43  | male   | <60         | <400            | ≥5              | C          | IIIa       | III-IV           | Yes  |
| 44  | male   | ≥60         | <400            | ≥5              | C          | IIIa       | I-II             | Yes  |
| 45  | male   | ≥60         | <400            | <5              | A          | Ia         | III-IV           | No   |
| 46  | female | ≥60         | <400            | ≥5              | B          | IIa        | I-II             | No   |
| 47  | male   | <60         | ≥400            | <5              | A          | Ib         | III-IV           | No   |
| 48  | male   | <60         | ≥400            | <5              | A          | Ia         | III-IV           | No   |
| 49  | male   | ≥60         | ≥400            | ≥5              | B          | Ib         | III-IV           | No   |
| 50  | male   | <60         | ≥400            | ≥5              | C          | IIIa       | III-IV           | Yes  |

AFP, alpha fetoprotein (ng/ml); BCLC, Barcelona Clinic Liver Cancer; CNLC, China Liver Cancer Staging; PVTT, Portal Vein Tumor Thrombus.

Supplementary Table 2. The significantly differential expression levels of immune-related checkpoints in high- and low-*RAD51API* expression subgroups. *RAD51API*, *RAD51* associated protein 1.

| Genes           | logFC | Ave Expr <sup>a</sup> | t <sup>b</sup> | B <sup>c</sup> | adj. <i>P</i> -value <sup>d</sup> |
|-----------------|-------|-----------------------|----------------|----------------|-----------------------------------|
| <i>RAD51API</i> | 2.32  | 1.58                  | 16.64          | 98.57          | 1.24E-46                          |
| <i>CD40</i>     | 2.89  | 7.31                  | 5.07           | 4.70           | 6.11E-06                          |
| <i>TNFRSF4</i>  | 0.83  | 1.97                  | 4.73           | 3.11           | 2.37E-05                          |
| <i>PDCD1</i>    | 1.44  | 1.19                  | 4.58           | 2.45           | 3.69E-05                          |
| <i>LGALS9</i>   | 2.80  | 5.29                  | 4.55           | 2.30           | 3.69E-05                          |
| <i>TNFRSF14</i> | 2.09  | 8.88                  | 4.15           | 0.64           | 0.000139                          |
| <i>LAG3</i>     | 1.09  | 1.62                  | 3.71           | -1.01          | 0.000603                          |
| <i>TNFRSF18</i> | 0.90  | 1.23                  | 3.50           | -1.75          | 0.001215                          |
| <i>CD27</i>     | 1.15  | 1.65                  | 3.41           | -2.05          | 0.001553                          |
| <i>IDO1</i>     | 0.88  | 1.13                  | 3.16           | -2.85          | 0.003441                          |
| <i>CD44</i>     | 2.66  | 5.52                  | 2.87           | -3.71          | 0.007378                          |
| <i>HAVCR2</i>   | 0.93  | 1.95                  | 2.49           | -4.73          | 0.019592                          |
| <i>CD48</i>     | 0.90  | 2.20                  | 2.34           | -5.09          | 0.028132                          |

<sup>a</sup> Average gene expression; <sup>b</sup> t value of T test after adjustment; <sup>c</sup> The logarithm of standard deviation value after bayes adjustment; <sup>d</sup> The adjusted *P*-value.
